# Supplementary material for: An activated carbon fiber supported Fe2O3@bismuth carbonate heterojunction for enhanced visible light degradation of emerging pharmaceutical pollutants
Source: Royal Society of Chemistry journal article supplement (doi:10.1039/d1re00250c), 2021-01-01
Supplement: d1re00250c1.pdf [file d1re00250c1.pdf]

## Supporting Information

### **Activated Carbon Fiber Supported Fe<sub>2</sub>O<sub>3</sub>@Bismuth Carbonate Heterojunction for Enhanced Visible Light Degradation of Emerging Pharmaceutical Pollutant**

Prasenjit Kar<sup>†</sup>, Komal Shukla<sup>†</sup>, Pratyush Jain<sup>†</sup> and Raju Kumar Gupta<sup>\*,†,‡,§,||</sup>

<sup>†</sup>Department of Chemical Engineering

<sup>§</sup>Department of Sustainable Energy Engineering

<sup>||</sup>Center for Environmental Science and Engineering

Indian Institute of Technology Kanpur, Kanpur 208016, Uttar Pradesh, India

\*Corresponding author. Tel: +91-5122596972; Fax: +91-5122590104.

*E-mail address:* guptark@iitk.ac.in

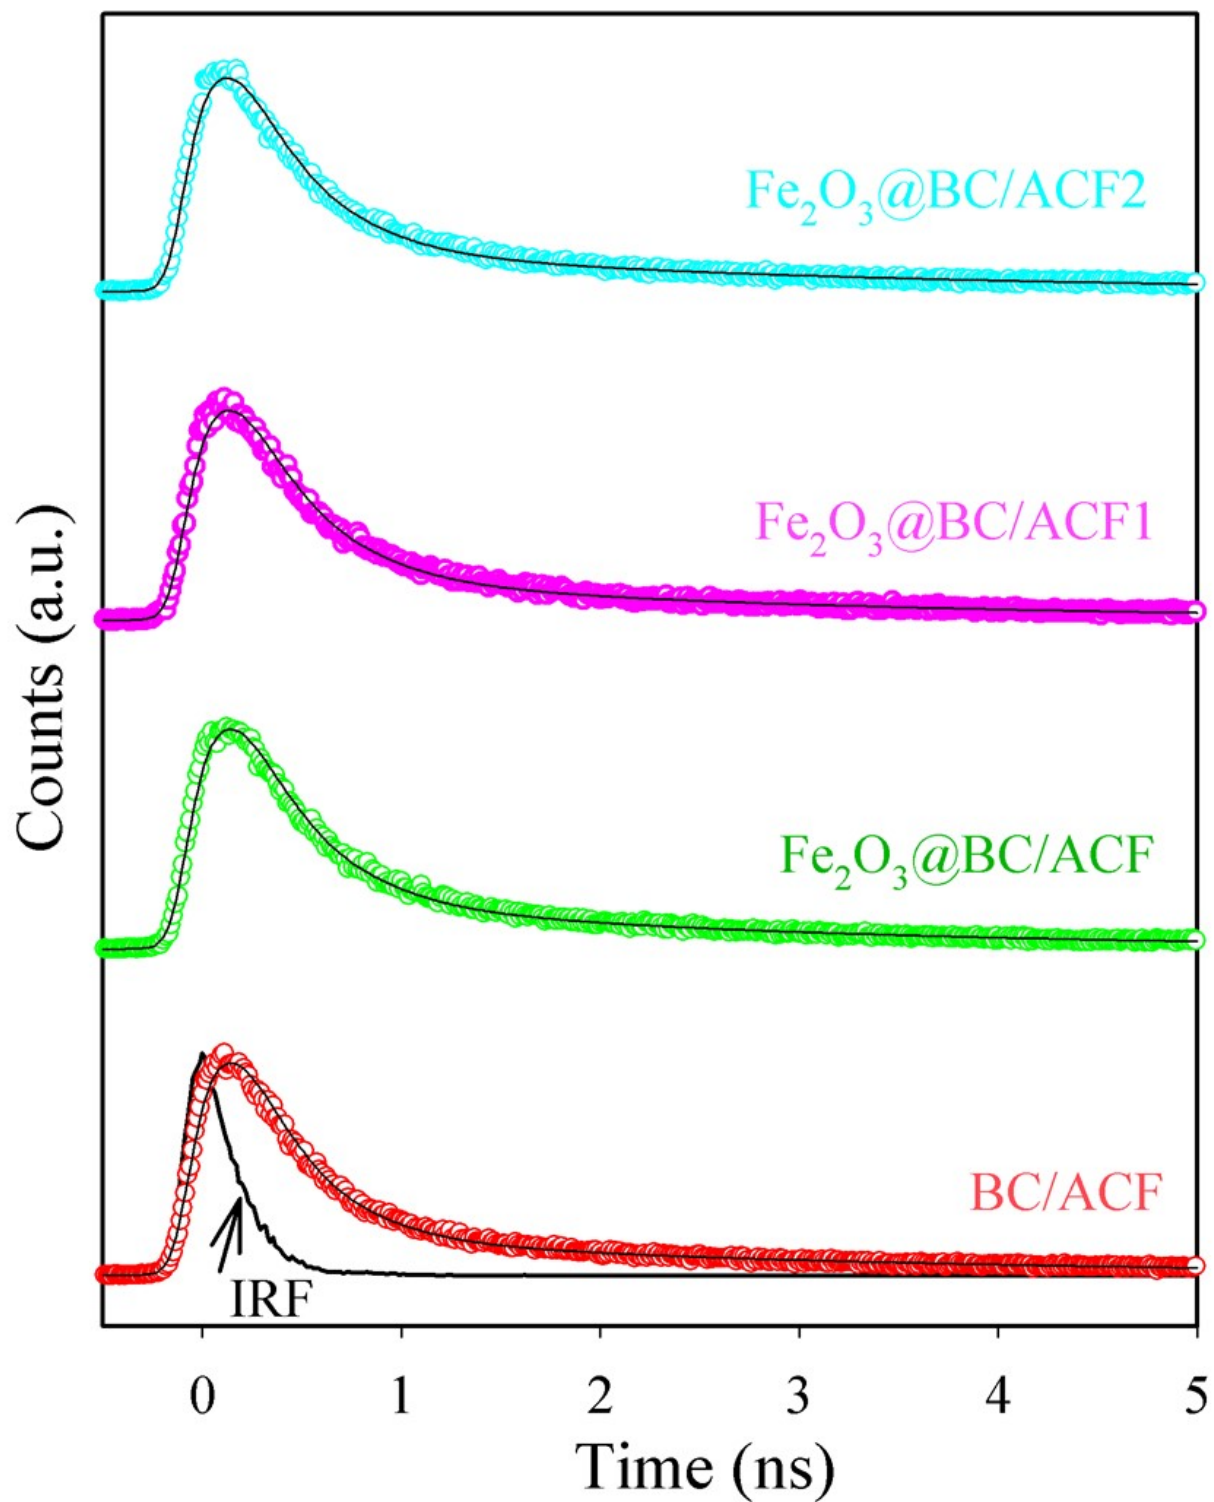

**Figure S1.** Picosecond-resolved PL transients of BC/ACF,  $\text{Fe}_2\text{O}_3@BC/ACF$ ,  $\text{Fe}_2\text{O}_3@BC/ACF1$  and  $\text{Fe}_2\text{O}_3@BC/ACF2$  measured at  $\lambda_{\text{em}} = 460$  nm upon  $\lambda_{\text{ex}} = 375$  nm.

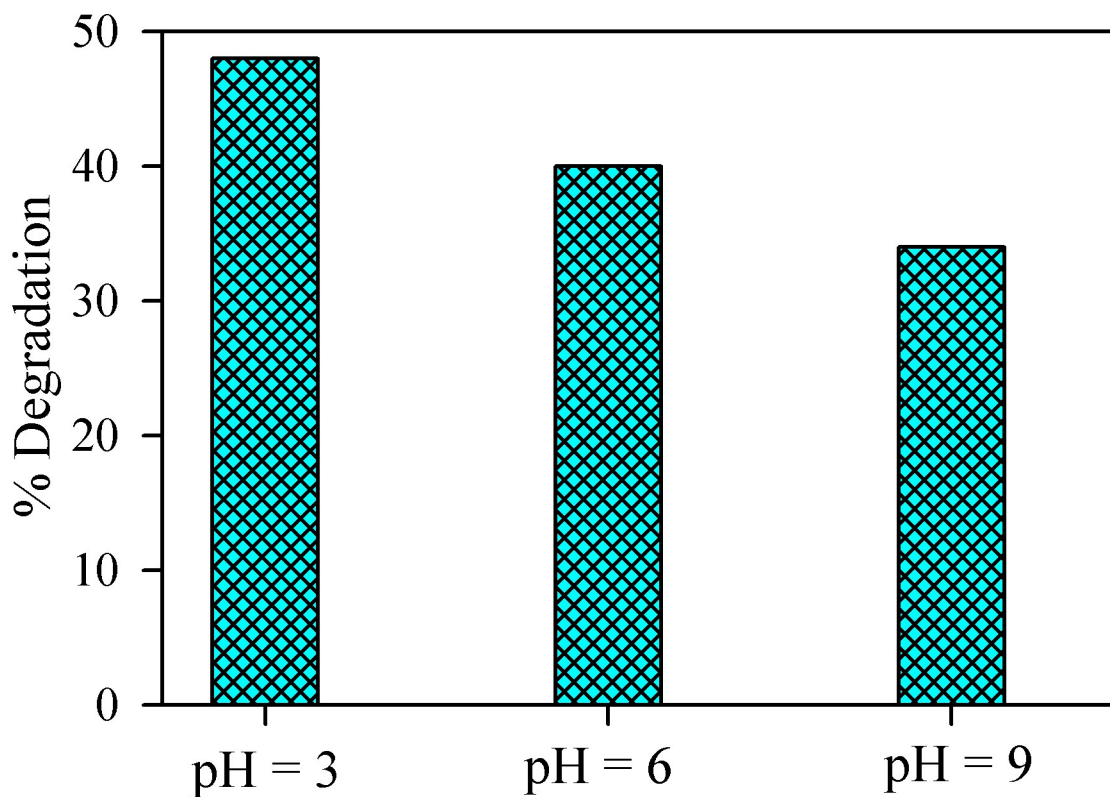

**Figure S2.** Effect of pH on the photocatalytic activity of  $\text{Fe}_2\text{O}_3@\text{BC}/\text{ACF1}$ .

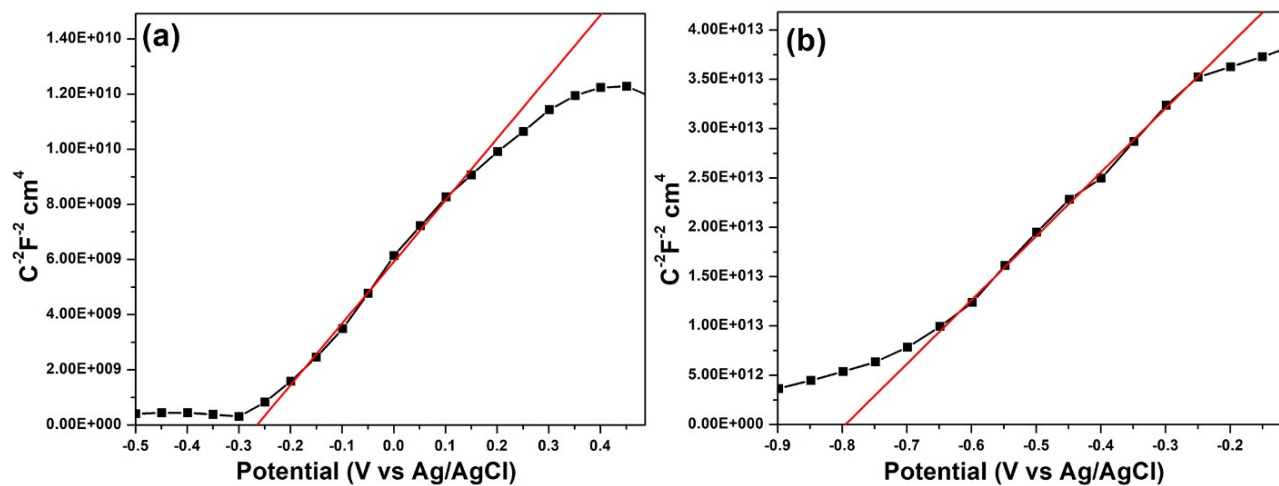

**Figure S3.** The Mott-Schottky plots of (a) BC, and (b)  $\text{Fe}_2\text{O}_3$  electrodes.
